# Supplementary material
Source: PubMed Central journal article supplement (PMC4789976)
Supplement: ferj000525.wf1_default.pdf [file ferj000525.wf1_default.pdf]

## Frequency and mode of support in standard care and proactive support groups

| Standard care                                         | Mode of communication     |       |     |                                          |
|-------------------------------------------------------|---------------------------|-------|-----|------------------------------------------|
| Timing of support (before quit date)                  | Standard quitline support |       |     |                                          |
|                                                       | Mail                      | Email | SMS | Telephone<br>Maximum number of calls = 4 |
| 1 to 6 weeks                                          | x                         |       |     |                                          |
| 1 week                                                |                           |       |     | x                                        |
| 3 days                                                |                           | x     | x   |                                          |
| 2 days                                                | x                         |       |     |                                          |
| <b>Stop date</b>                                      |                           | x     | x   | x                                        |
| <b>Timing of support (after quit date)</b>            |                           |       |     |                                          |
| 2 days after                                          |                           |       |     | x                                        |
| 1 week                                                |                           | x     | x   |                                          |
| 3 weeks                                               |                           | x     | x   | x                                        |
| 1 month                                               | x                         | x     | x   |                                          |
| 3 months                                              | x                         |       |     |                                          |
| 6 months                                              |                           | x     | x   |                                          |
| Proactive support                                     | Mode of communication     |       |     |                                          |
| Timing of support (before quit date)                  | Standard quitline support |       |     | Additional proactive support             |
|                                                       | Mail                      | Email | SMS | Telephone<br>Maximum number of calls = 7 |
| Immediately after enrolment                           | x                         |       |     |                                          |
| 2 weeks before (if Quit Date > 3 weeks in the future) |                           |       |     | x                                        |
| 3 days                                                |                           | x     | x   |                                          |
| 2 days                                                | x                         |       |     | x                                        |
| <b>Stop Date</b>                                      |                           | x     | x   | x                                        |
| <b>Timing of support (after quit date)</b>            |                           |       |     |                                          |
| 3 days after                                          |                           |       |     | x                                        |
| 7 days                                                |                           | x     | x   | x                                        |
| 14 days                                               |                           | x     | x   | x                                        |
| 21 days                                               |                           |       |     | x                                        |
| 1 month                                               | x                         | x     | x   |                                          |
| 3 months                                              | x                         |       |     |                                          |
| 6 months                                              |                           | x     | x   |                                          |
